# Supplementary material
Source: publisher figshare collection journal article supplement (https://acs.figshare.com/ndownloader/files/20164085)
Supplement: Supplementary file 1 [file 20164085]

---

## Supporting Information

### **A humid-air-operable, NO<sub>2</sub>-responsive polymer transistor series circuit with improved signal-to-drift ratio based on polymer semiconductor oxidation**

Huidong Fan<sup>1,2</sup>, Hui Li<sup>1</sup>, Jinfeng Han<sup>1</sup>, Nathaniel McKeever<sup>1</sup>, Junsheng Yu<sup>2</sup>, Howard E. Katz<sup>1\*</sup>

*<sup>1</sup>Department of Materials Science and Engineering, Whiting School of Engineering, Johns Hopkins University, 3400 North Charles Street, Baltimore, Maryland 21218, United States*

*<sup>2</sup>State Key Laboratory of Electronic Thin Films and Integrated Devices, School of Optoelectronic Information, University of Electronic Science and Technology of China (UESTC), Chengdu 610054, P. R. China*

*\*Corresponding author; email [hekatz@jhu.edu](mailto:hekatz@jhu.edu)*

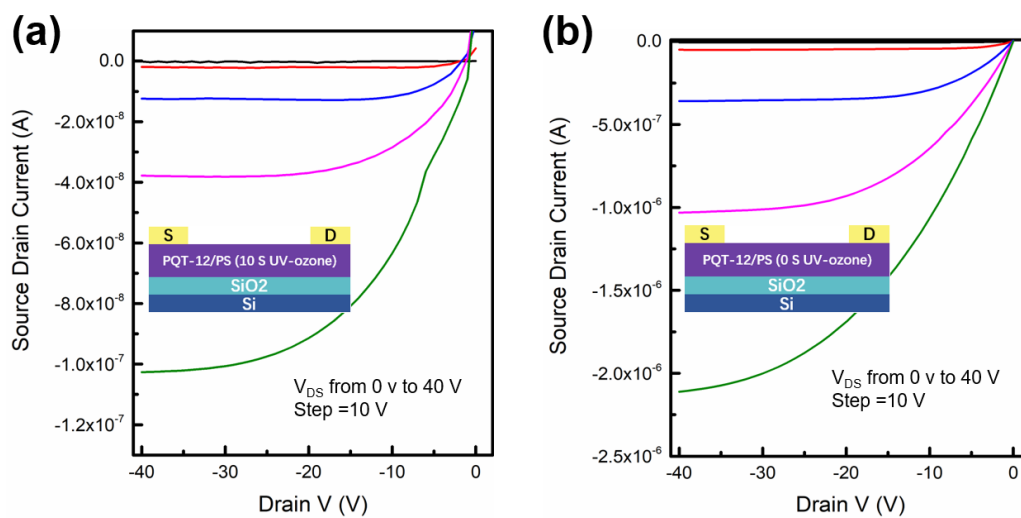

**Figure S1.** Output curves of the single devices exposed to (a) 10 s UV-ozone (b) 0 s UV-ozone.

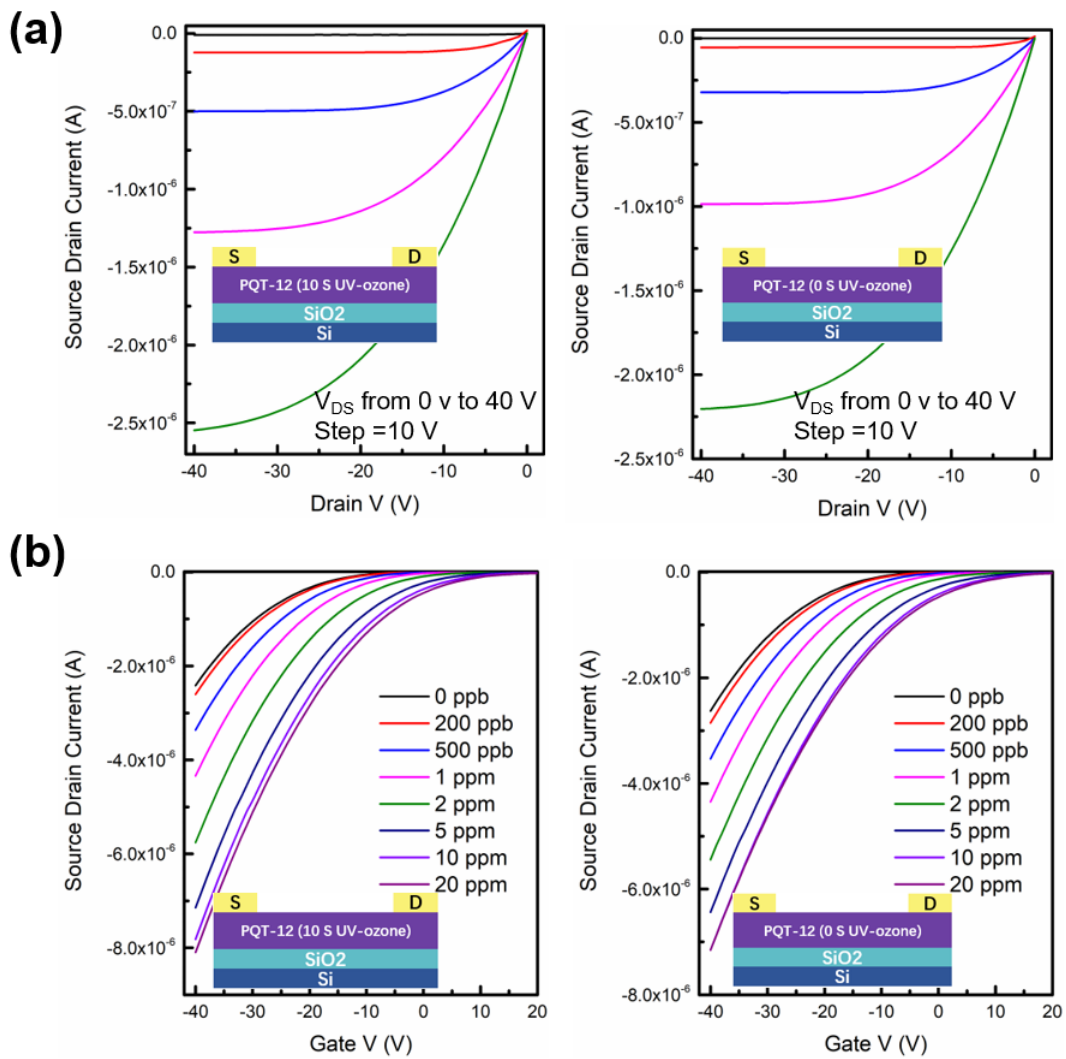

**Figure S2.** (a) Output curves and (b) the sensing performance of the pure PQT-12 devices with or without 10 s UV-ozone treatment.

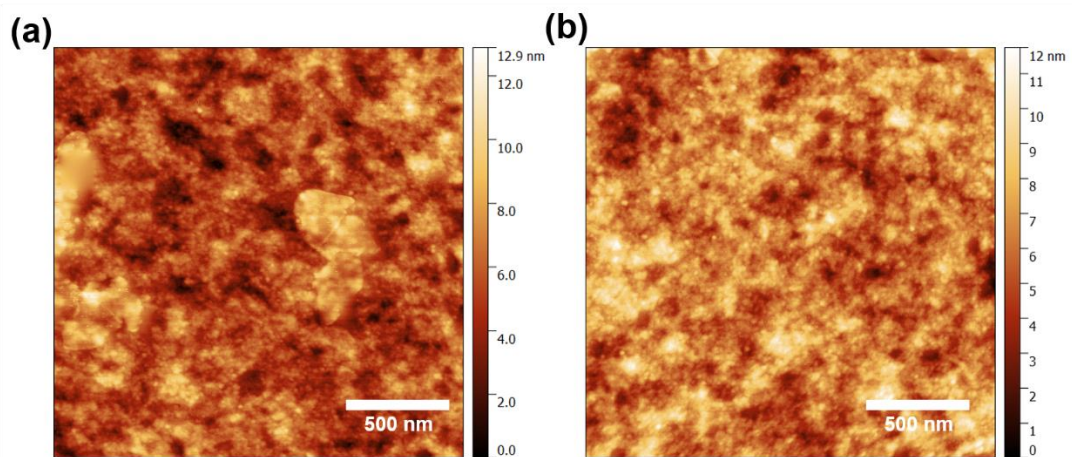

**Figure S3.** AFM images of PQT-12/PS blend film with (a) 0 s and (b) 10 s UV-Ozone treatment.

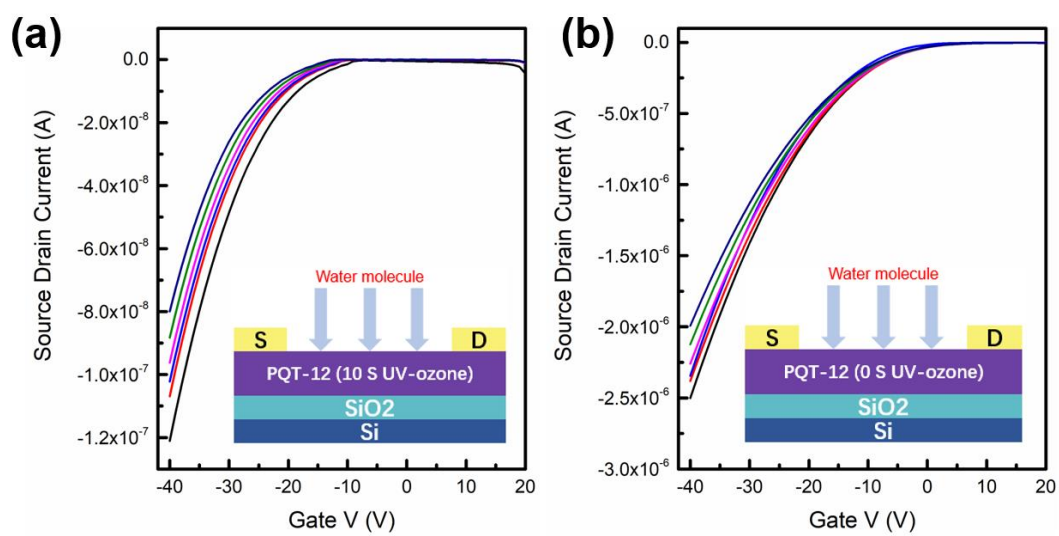

**Figure S4.** Response towards humid environment of the (a) 10 s UV-ozone device (b) 0 s UV-ozone device.

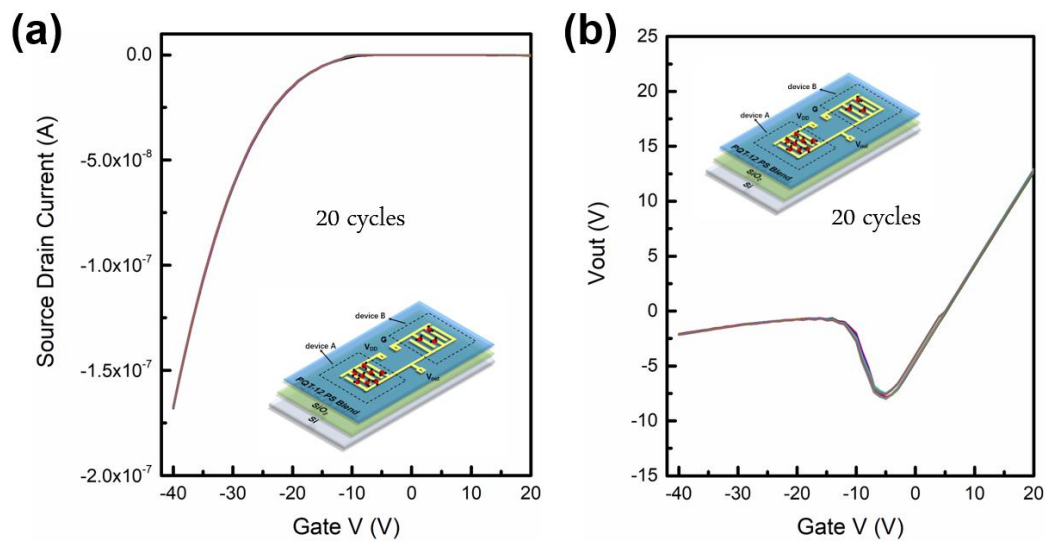

**Figure S5.** (a) On current and (b)  $V_{out}$  of the logic circuit under 20 cycles test.

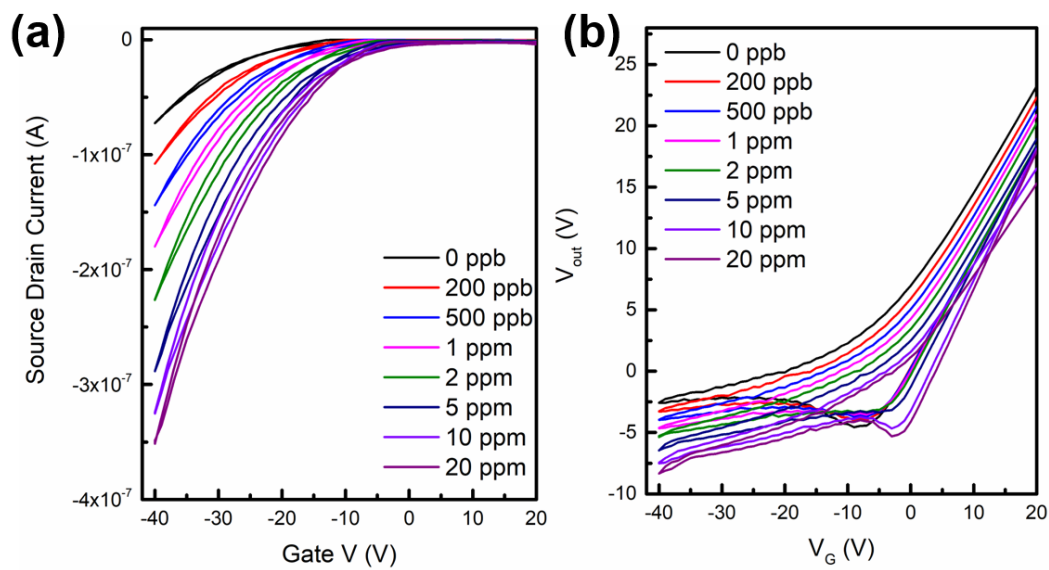

**Figure S6.** After being stored in air for 2 weeks, (a)  $I_{DS}$  and (b)  $V_{out}$  of the logic series circuit when exposed to different NO<sub>2</sub> concentrations

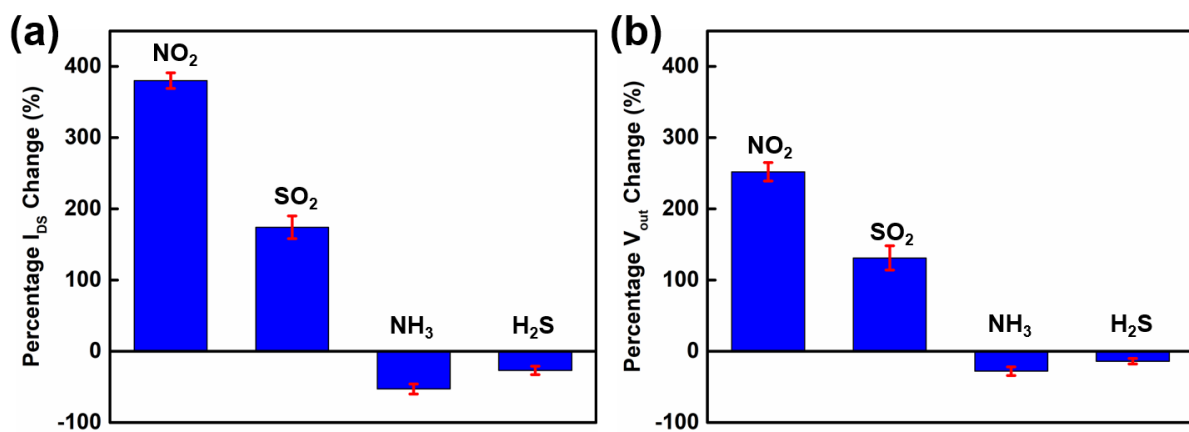

**Figure S7.** Response of (a)  $I_{DS}$  and (b)  $V_{out}$  after exposure to common gases,  $NO_2$  (5 ppm),  $SO_2$  (5 ppm),  $NH_3$  (5 ppm),  $H_2S$  (5 ppm)
